# Supplementary material for: Overactive IGF1/Insulin Receptors and NRASQ61R Mutation Drive Mechanisms of Resistance to Pazopanib and Define Rational Combination Strategies to Treat Synovial Sarcoma
Source: MDPI journal article supplement (doi:10.3390/cancers11030408), 2019-03-22
Supplement: s1 [file s1]

**Table S1****Antiproliferative activity of pazopanib in human synovial sarcoma cell lines**

| <b>Cell line</b> | <b>Fusion transcript</b> | <b>pazopanib<br/>IC<sub>50</sub> [μM]<sup>a</sup></b> | <b>hours of treatment</b> |
|------------------|--------------------------|-------------------------------------------------------|---------------------------|
| SYO-1            | SS18-SSX2                | 0.6± 0.1                                              | 72                        |
| CME-1            | SS18-SSX2                | 3 ± 0.29                                              | 72                        |
| MoJo             | SS18-SSX1                | 13 ± 3                                                | 96                        |
| Aska-SS          | SS18-SSX1                | 5 ± 1.2                                               | 96                        |
| Yamato-SS        | SS18-SSX1                | > 15                                                  | 96                        |
| 1273/99          | SS18-SSX2                | > 15                                                  | 96                        |

<sup>a</sup> IC<sub>50</sub>, drug concentration producing 50% inhibition, determined by cell counting after 72h or 96h of treatment, according to the cells' growth rate.
