# Supplementary material for: Overactive IGF1/Insulin Receptors and NRASQ61R Mutation Drive Mechanisms of Resistance to Pazopanib and Define Rational Combination Strategies to Treat Synovial Sarcoma
Source: MDPI journal article supplement (doi:10.3390/cancers11030408), 2019-03-22
Supplement: s1 [file s1]

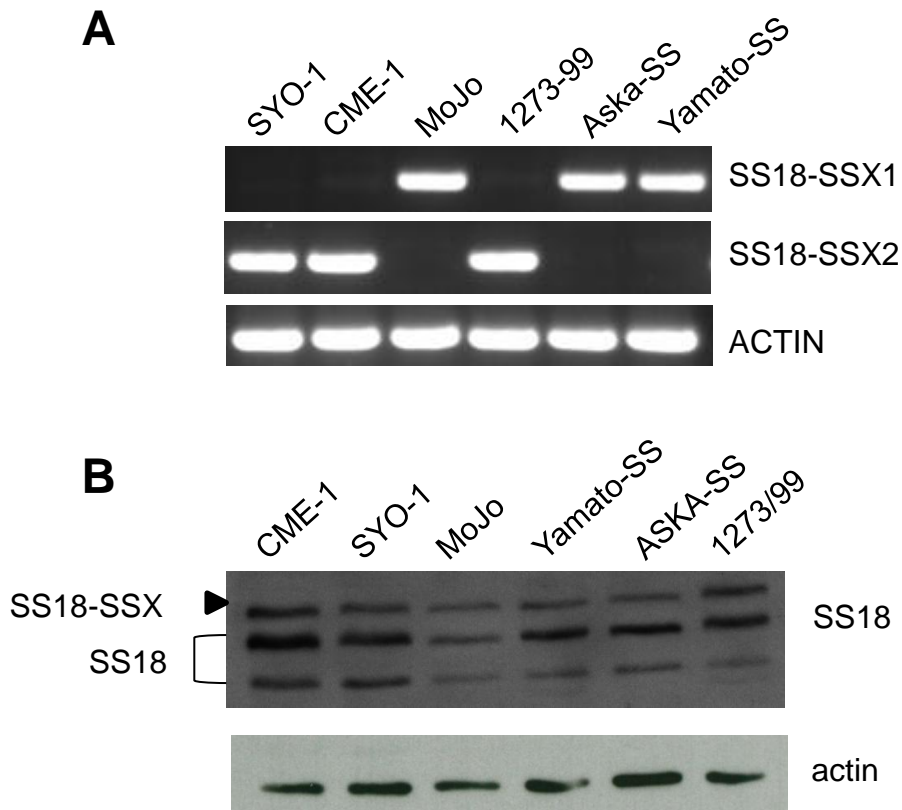

**Figure S1.** Expression of SS18-SSX fusion genes and proteins in SS cell lines. **A)** Expression of SS18-SSX transcripts detected by RT-PCR with specific sets of primers for the SS18-SSX1 and SS18-SSX2 chimeric genes. **B)** Expression of SS18-SSX fusion proteins detected by western blotting using anti-SS18 antibody. Actin serves as housekeeping gene and loading control.
