# Supplementary material for: Overactive IGF1/Insulin Receptors and NRASQ61R Mutation Drive Mechanisms of Resistance to Pazopanib and Define Rational Combination Strategies to Treat Synovial Sarcoma
Source: MDPI journal article supplement (doi:10.3390/cancers11030408), 2019-03-22
Supplement: s1 [file s1]

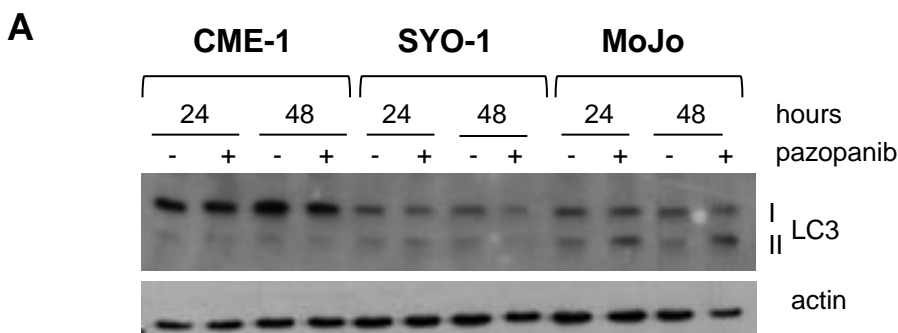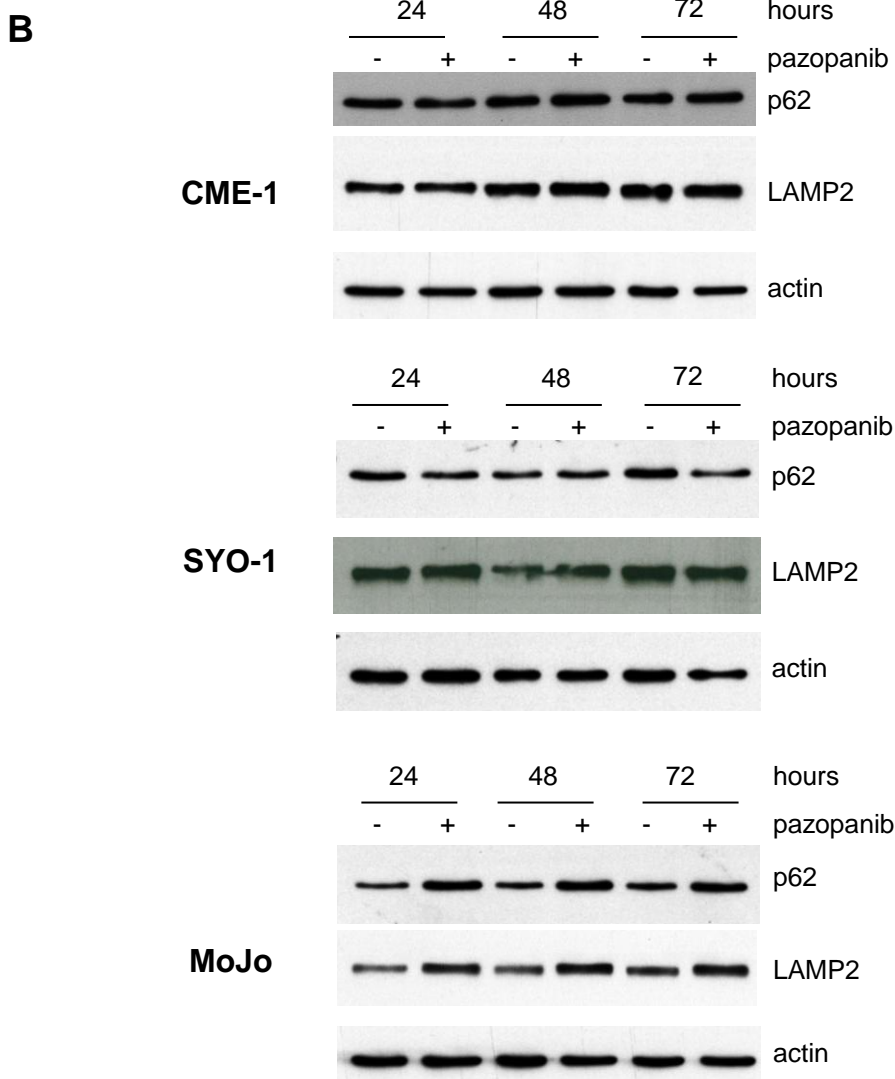

**Figure S2.** Effect of pazopanib on autophagic-lysosomal pathway in SS cell lines. Cells were exposed to solvent or pazopanib (5  $\mu$ M CME-1 cells, 1.3  $\mu$ M SYO-1 cells, 20  $\mu$ M MoJo cells) for the indicated times and then lysed and processed for western blot analysis to monitor overtime the effect on levels of autophagy-related proteins. (A) Levels of LC3I and its lipidated form LC3II. (B) Levels of p62 and lysosomal protein LAMP2.
